# Supplementary material for: Dihydrochalcones and Diterpenoids from Pteris ensiformis and Their Bioactivities
Source: PubMed Central journal article supplement (PMC6151822; doi:10.3390/molecules22091413), 2017-08-25
Supplement: molecules-22-01413-s001.pdf [file molecules-22-01413-s001.pdf]

# Dihydrochalcones and Diterpenoids from *Pteris ensiformis* and their Bioactivities

## Supplementary Materials

### List of Contents

**Fig. S1** The IR Spectrum of **1**

**Fig. S2** The  $^1\text{H}$  NMR Spectrum of **1** in  $\text{MeOH-}d_4$  (600 MHz)

**Fig. S3** The  $^{13}\text{C}$  NMR Spectrum of **1** in  $\text{MeOH-}d_4$  (150MHz)

**Fig. S4** The gHSQC Spectrum of **1** in  $\text{MeOH-}d_4$  (600 MHz)

**Fig. S5** The gHMBC Spectrum of **1** in  $\text{MeOH-}d_4$  (600 MHz)

**Fig. S6** The gCOSY Spectrum of **1** in  $\text{MeOH-}d_4$  (600 MHz)

**Fig. S7** HRESIMS spectrum of **1**

**Fig. S8** The  $^1\text{H}$  NMR Spectrum of (+)-**1** in  $\text{MeOH-}d_4$  (600 MHz)

**Fig. S9** The  $^1\text{H}$  NMR Spectrum of (-)-**1** in  $\text{MeOH-}d_4$  (600 MHz)

**Fig. S10** The CD Spectra of (+)-**1** (blue) and (-)-**1** (black).

**Fig. S11**  $^1\text{H-}^1\text{H}$  COSY and HMBC correlations of **1**

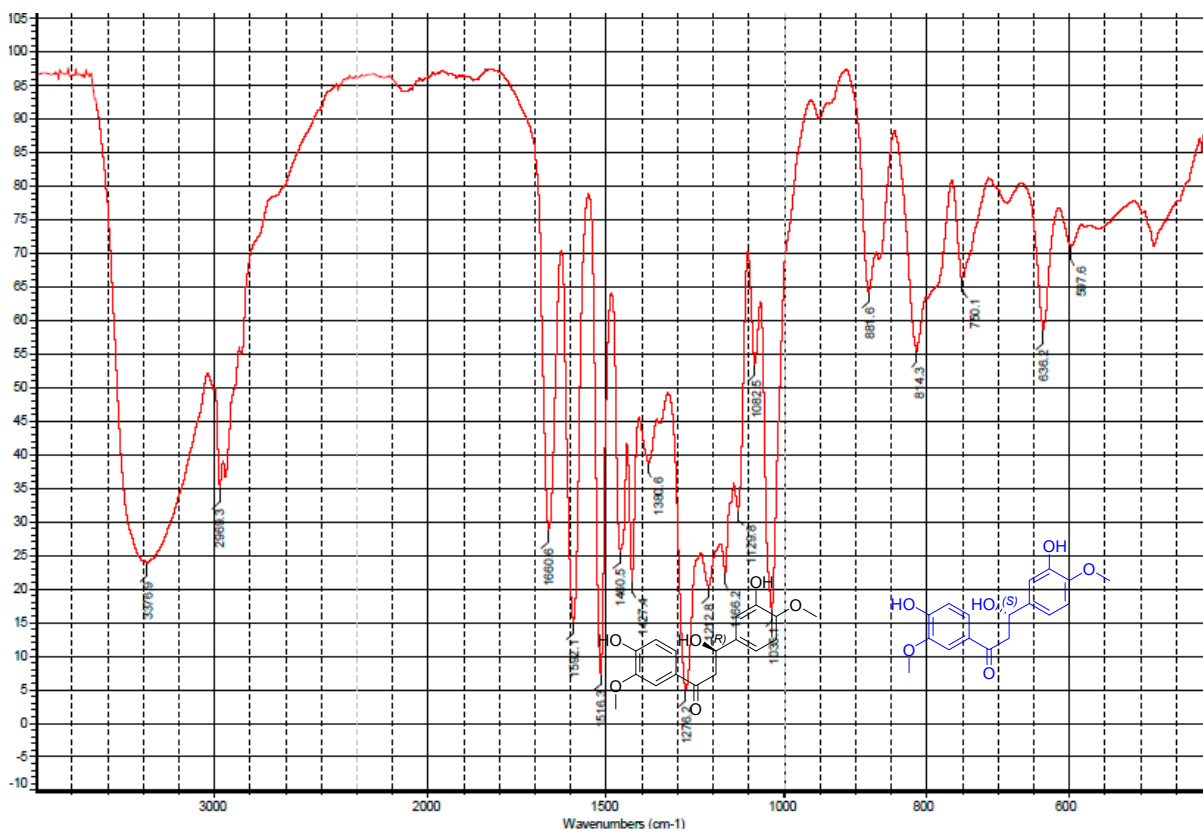

Fig. S1 IR spectrum of compound 1

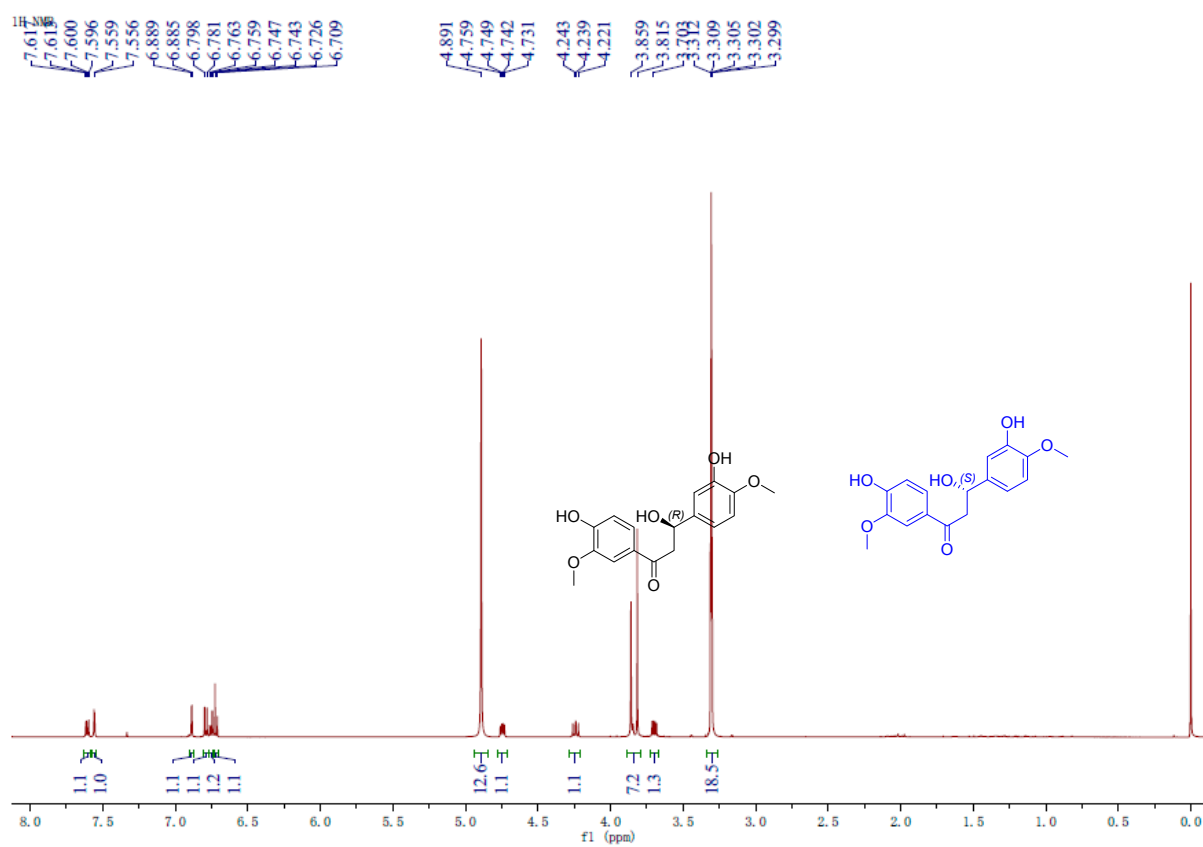

Fig. S2 <sup>1</sup>H-NMR spectrum of compound 1 in MeOH-d<sub>4</sub> (600 MHz)

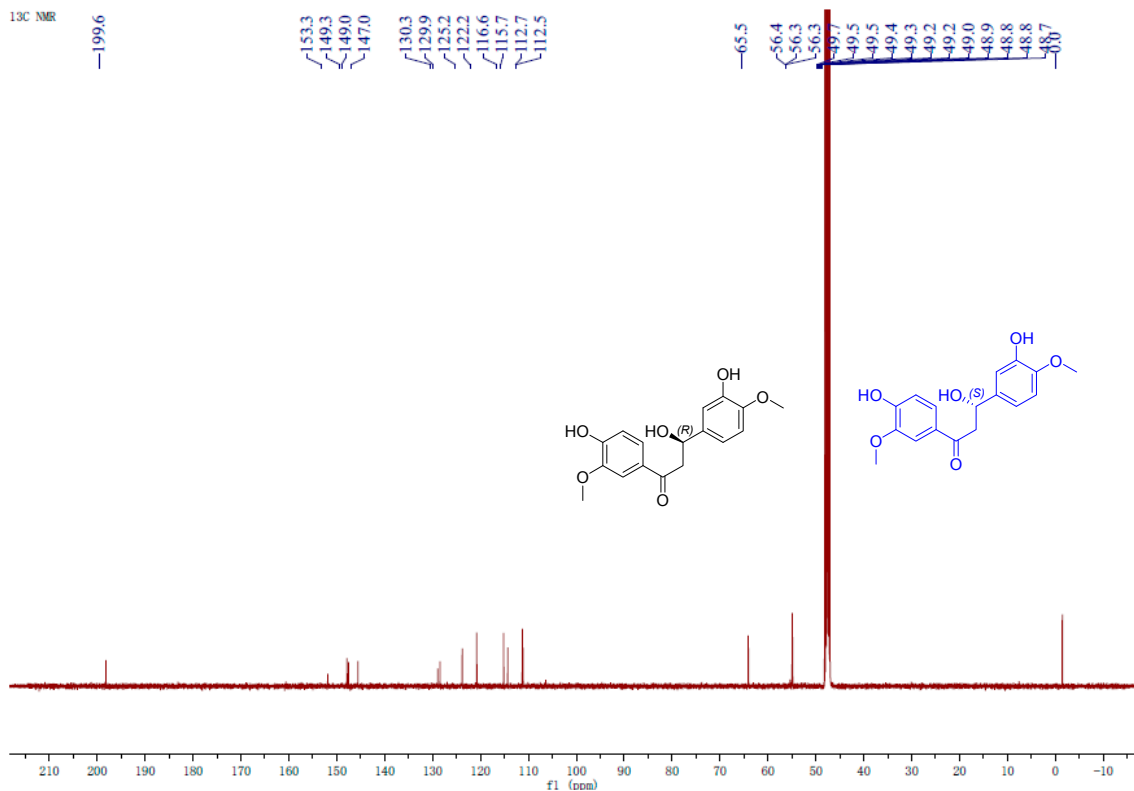

**Fig. S3** <sup>13</sup>C-NMR spectrum of compound **1** in MeOH-*d*<sub>4</sub> (150 MHz)

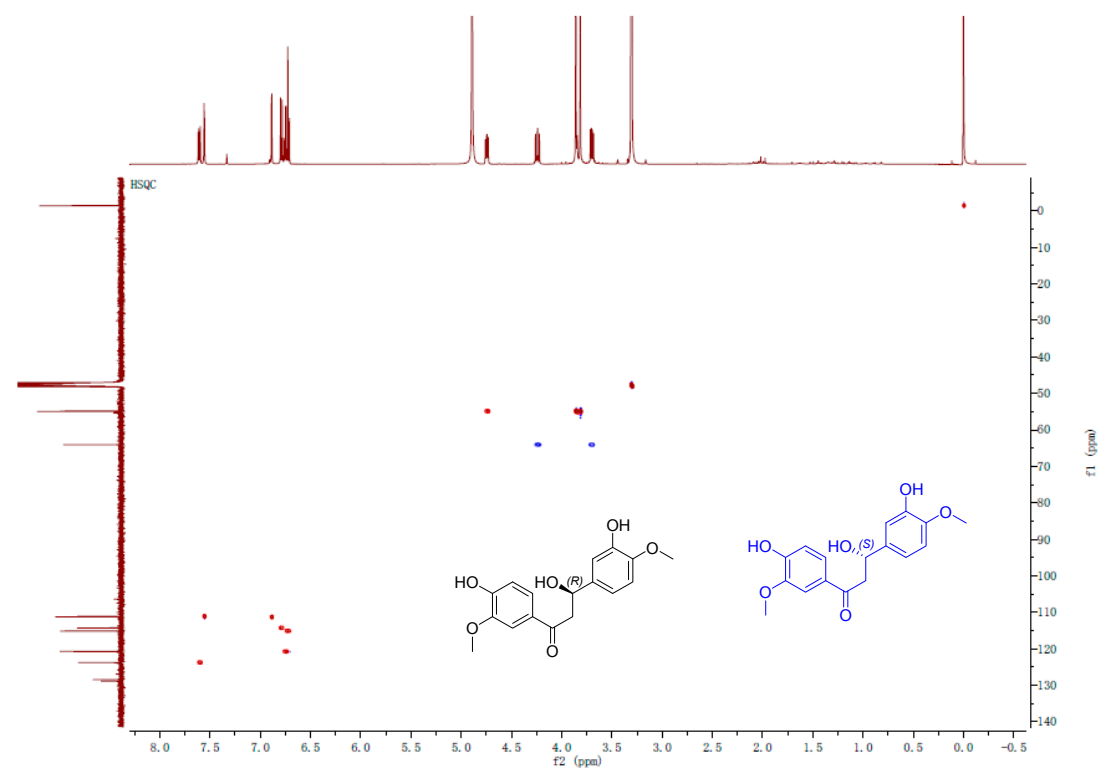

**Fig. S4** HSQC spectrum of compound **1** in MeOH-*d*<sub>4</sub> (600 MHz)

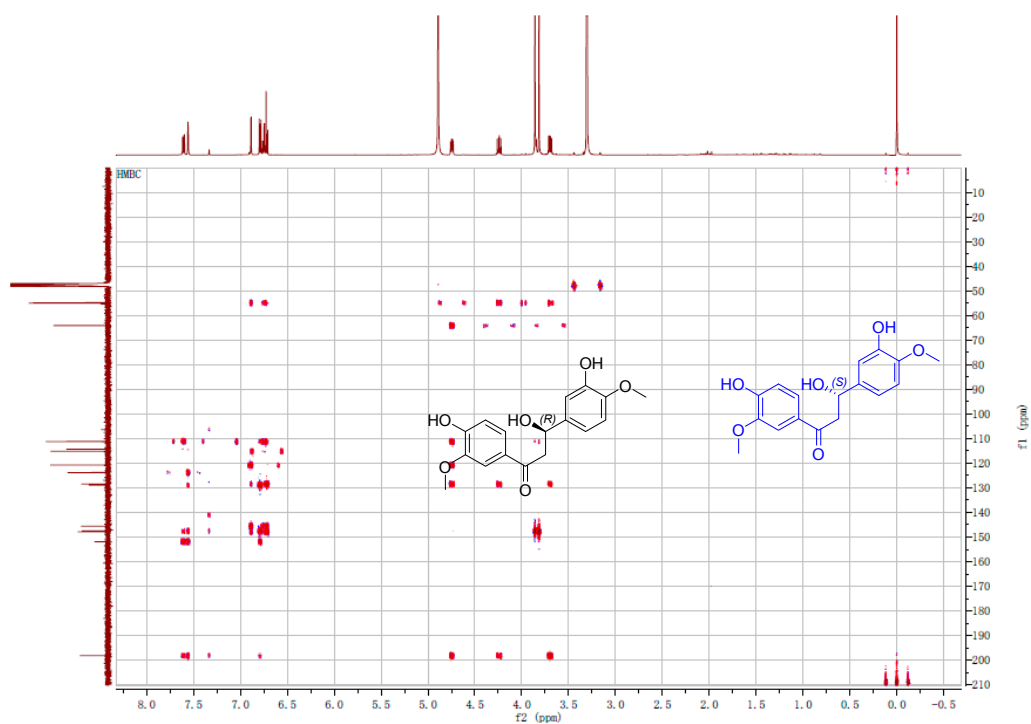

Fig. S5 HMBC spectrum of compound **1** in MeOH-*d*<sub>4</sub> (600 MHz)

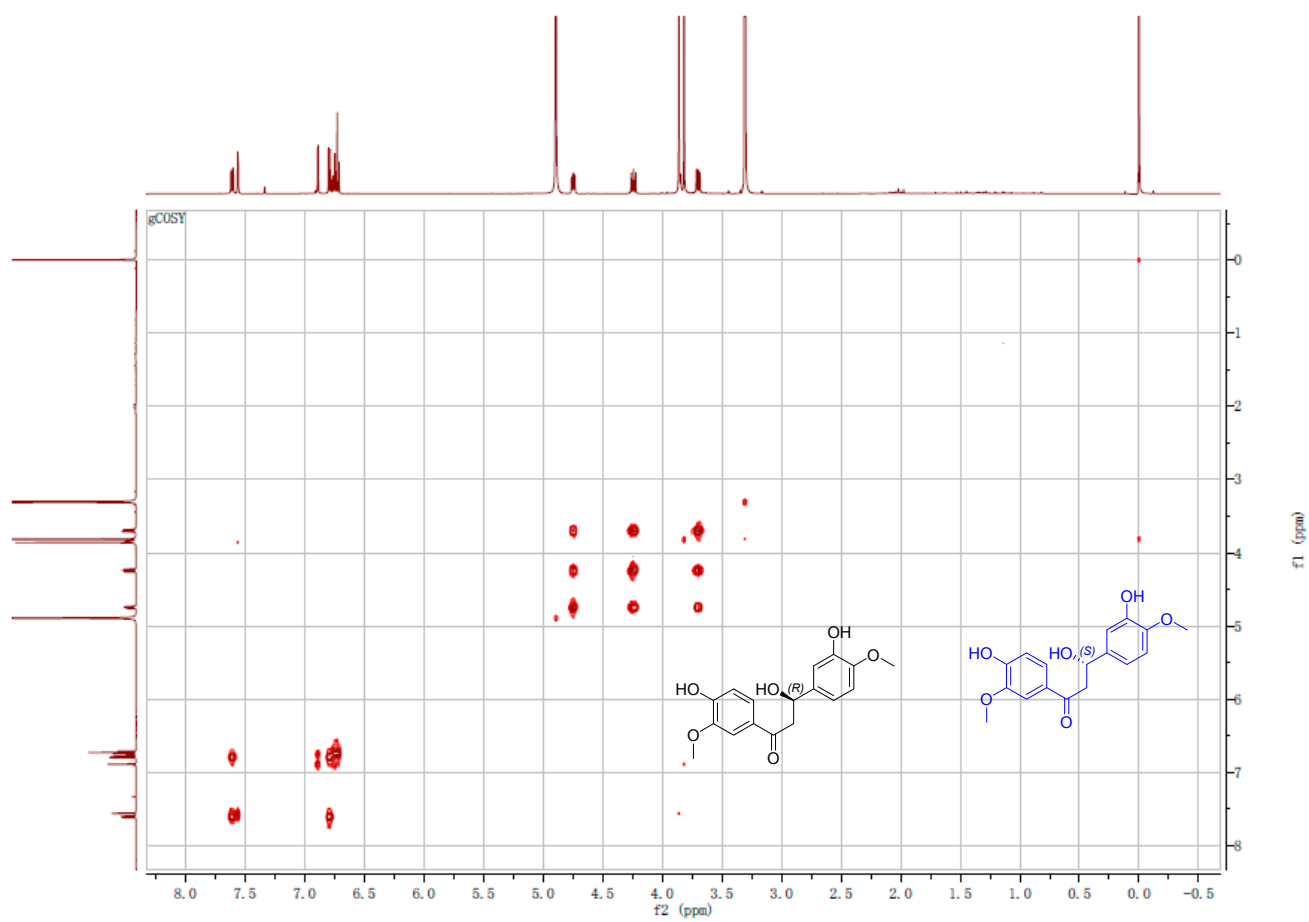

Fig. S6 <sup>1</sup>H-<sup>1</sup>H COSY spectrum of compound **1** in MeOH-*d*<sub>4</sub> (600 MHz)

MS Formula Results: + Scan (4.752 min) Sub (2015101201.d)

| m/z      | Ion                | Formula  | Abundance |
|----------|--------------------|----------|-----------|
| 318.1177 | (M+H) <sup>+</sup> | C17H18O6 | 1124030   |

  

| Best | Formula (M) | Ion Formula | Score | Cross Sco | Mass     | Calc Mass | Calc m/z | Diff (ppm) | Abs Diff (ppm) | Mass Match | Abund Match | Spacing Match | DBE |
|------|-------------|-------------|-------|-----------|----------|-----------|----------|------------|----------------|------------|-------------|---------------|-----|
| ✓    | C17H18O6    | C17H19O6    | 99.99 |           | 318.1104 | 318.1103  | 319.1176 | -0.27      | 0.27           | 100        | 99.97       | 99.99         | 9   |
|      | C18H14N4O2  | C18H15N4O2  | 99.58 |           | 318.1104 | 318.1117  | 319.119  | 3.92       | 3.92           | 99.52      | 99.36       | 99.58         | 14  |

Fig. S7 HRESIMS spectrum of compound 1

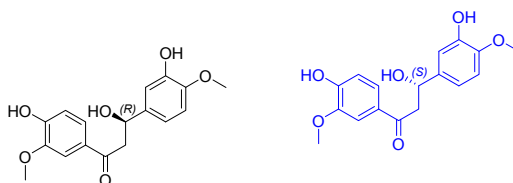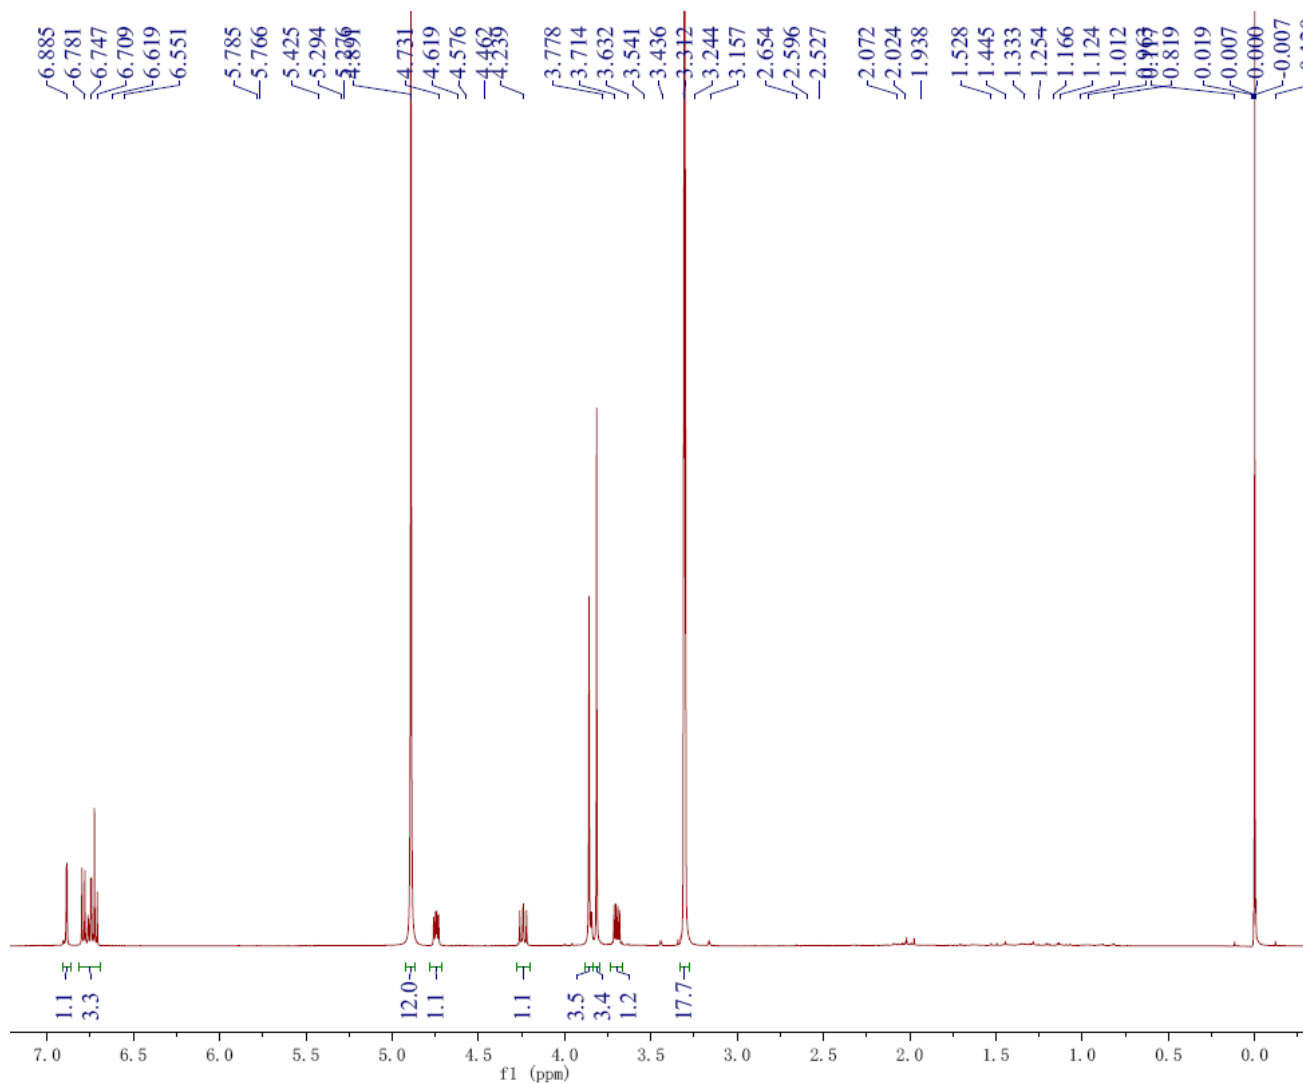

Fig. S8 The 1H NMR Spectrum of (+)-1 in MeOH-d<sub>4</sub> (600 MHz)

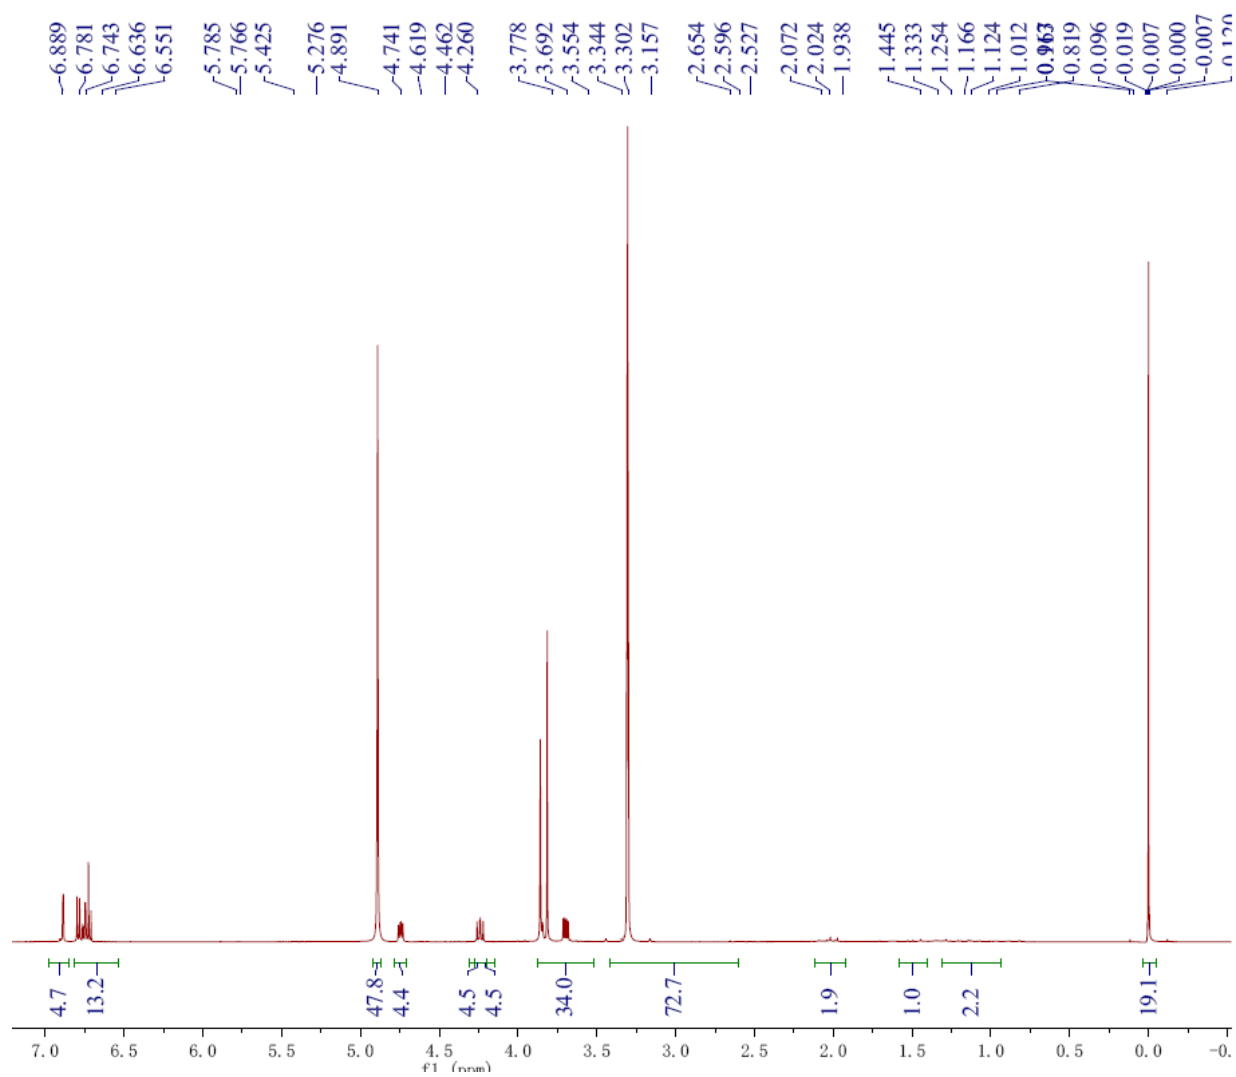

**Fig. S9** The  $^1\text{H}$  NMR Spectrum of (-)-**1** in  $\text{MeOH-}d_4$  (600 MHz)

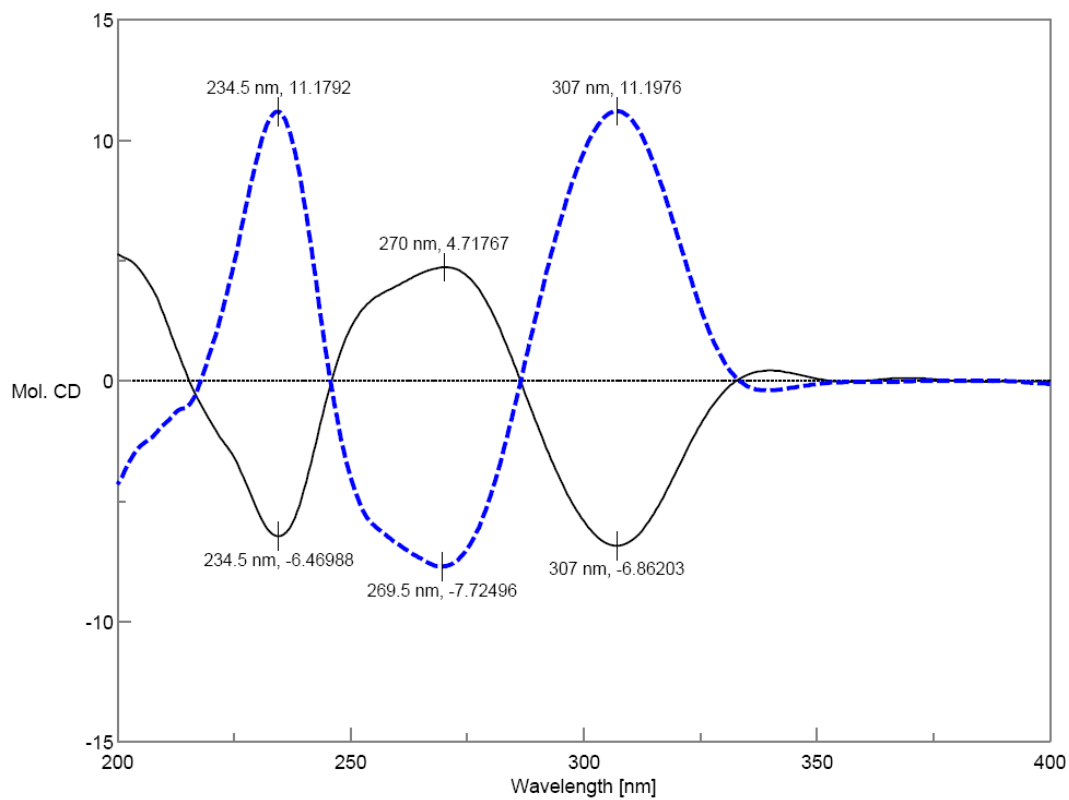

**Fig. S10** The CD Spectra of (+)-**1** (blue) and (-)-**1** (black).

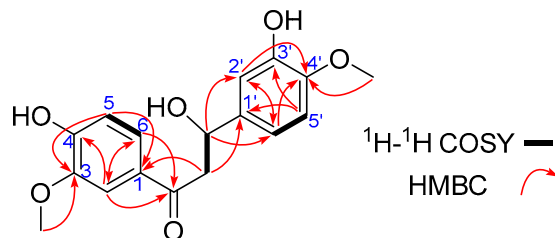

**Fig. S11**  $^1\text{H}-^1\text{H}$  COSY and HMBC correlations of **1**
